# Supplementary material for: Plant Alkaloids Inhibit Membrane Fusion Mediated by Calcium and Fragments of MERS-CoV and SARS-CoV/SARS-CoV-2 Fusion Peptides
Source: MDPI journal article supplement (doi:10.3390/biomedicines9101434), 2021-10-10
Supplement: s1 [file s1]

## Supplementary materials

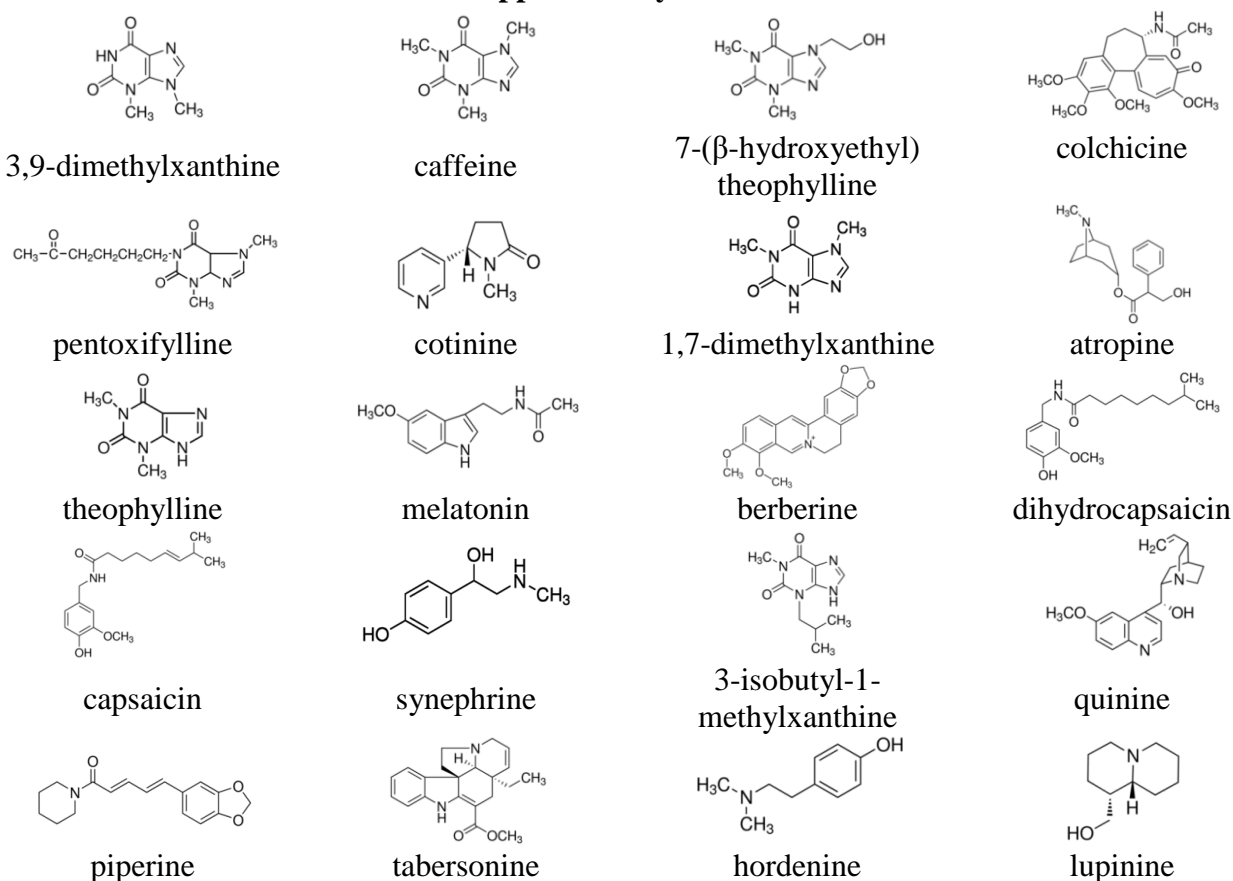

**Figure S1.** The chemical structures of the tested alkaloids.

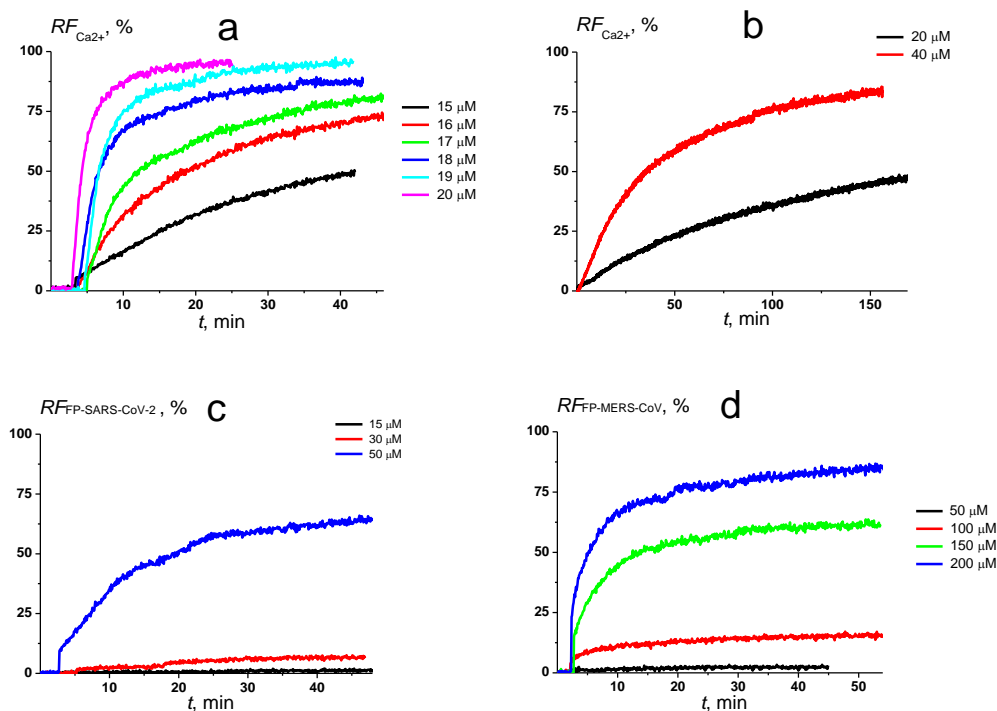

**Figure S2.** The time dependence of relative fluorescence of calcein leaked from DOPG/CHOL (80/20 mol%) (a), DOPC/DOPG/CHOL (40/40/20 mol%) (b), and POPC/SM/CHOL (60/20/20 mol%) (c, d) vesicles induced by different concentrations of  $CaCl_2$  (a, b), FP-SARS-CoV-2 (c) and FP-MERS-CoV (d). The relationship between the color line and the concentration of the fusion inducers is given on the figure.

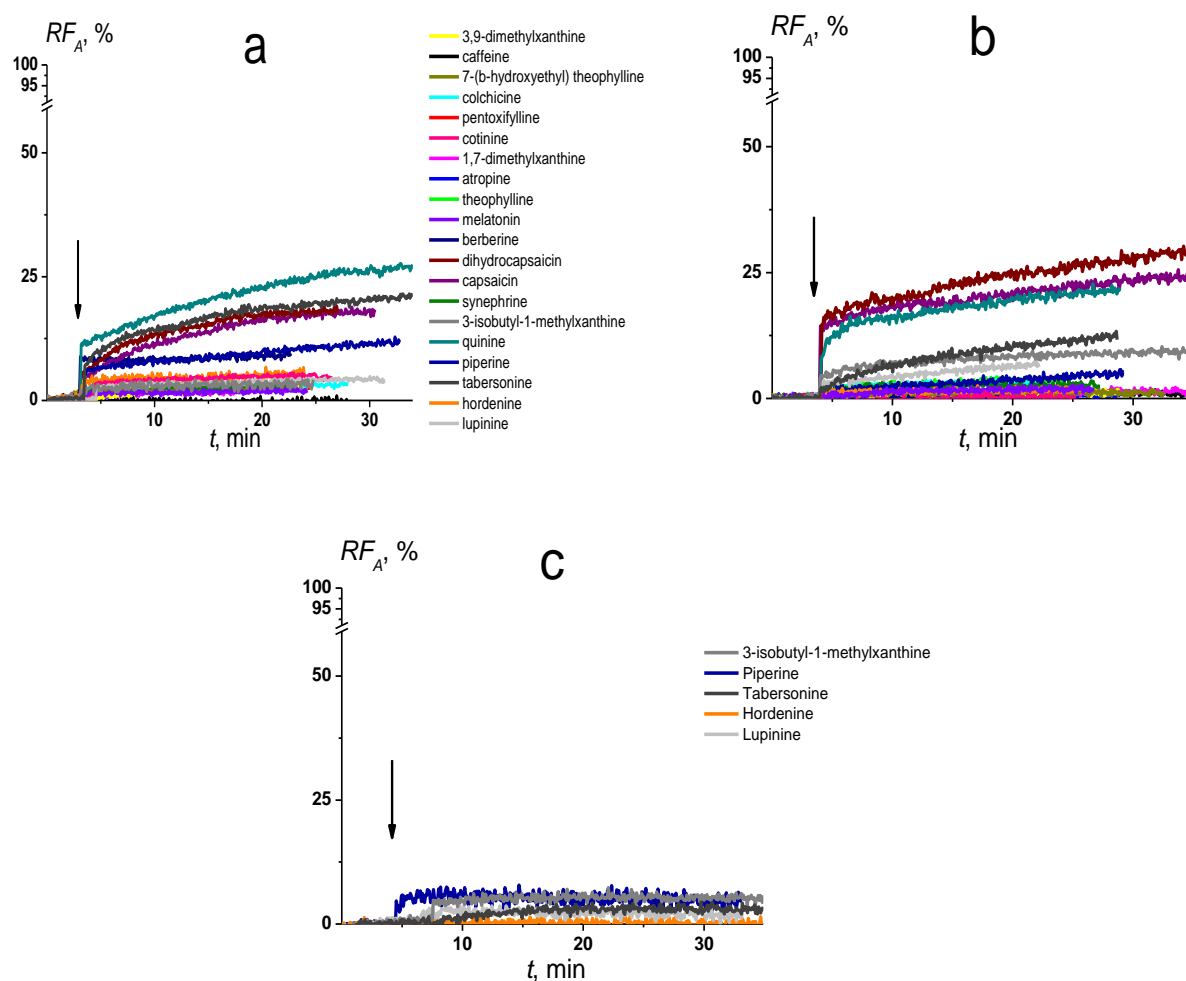

**Figure S3.** The time dependence of relative fluorescence of calcein ( $RF_A$ , %) leaked from DOPG/CHOL (80/20 mol%) (a), DOPC/DOPG/CHOL (40/40/20 mol%) (b), and POPC/SM/CHOL (60/20/20 mol%) (c) vesicles induced by alkaloids alone. Alkaloids were added into the liposomal suspension up to a concentration of 400  $\mu$ M (except for 40  $\mu$ M of tabersonine in DOPG/CHOL and DOPC/DOPG/CHOL vesicles) at the initial moment. The relationship between the color line and the compound is given on the figure.

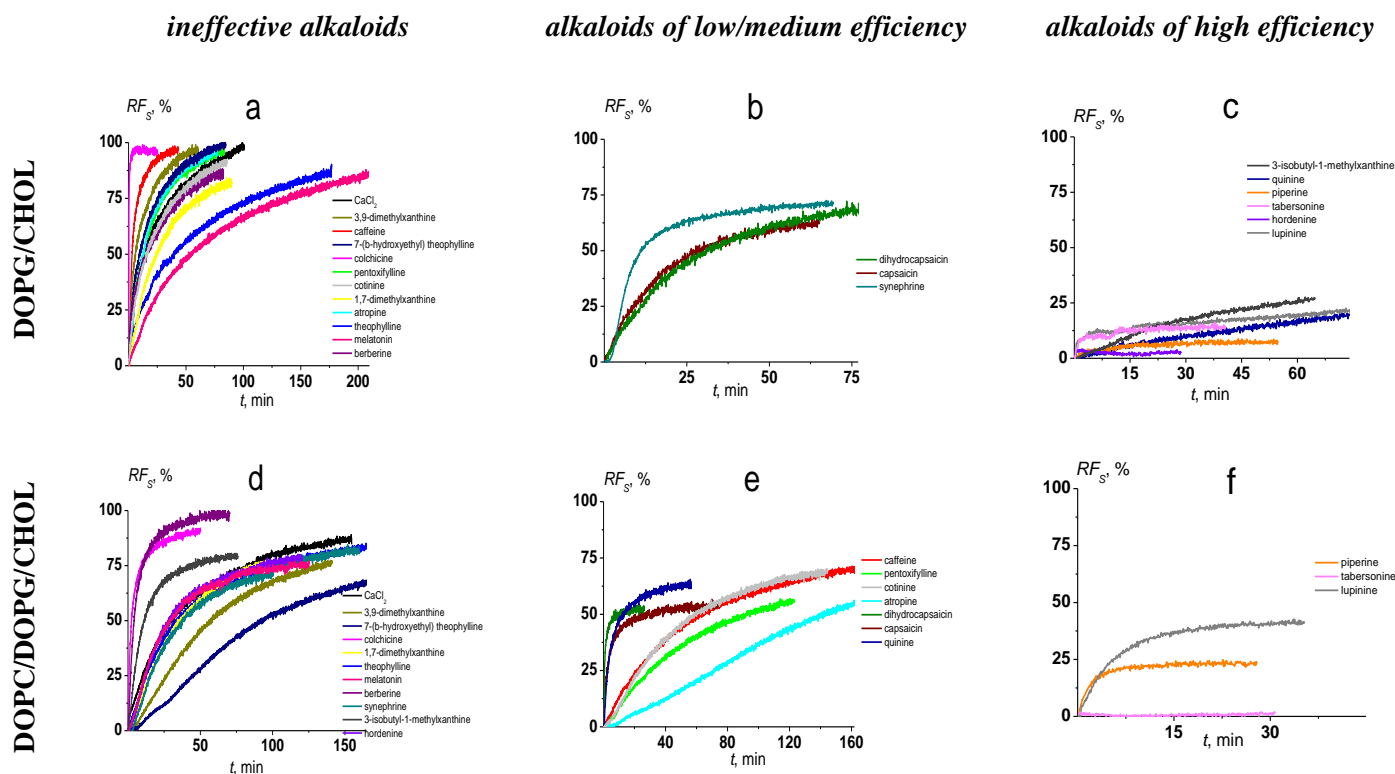

**Figure S4.** The time dependence of relative fluorescence of calcein ( $RF_s$ , %) leaked by the fusion of DOPG/CHOL (80/20 mol%) (a, b, c) and DOPC/DOPG/CHOL (40/40/20 mol%) (d, e, f) vesicles induced by 20 mM of  $CaCl_2$  in the absence (black line) and presence of alkaloids. Liposomes were incubated with 400  $\mu$ M of alkaloids (except for 40  $\mu$ M of tabersonine) for 30 min before the addition of  $CaCl_2$ . The relationship between the color line and the alkaloid is given on the figure.

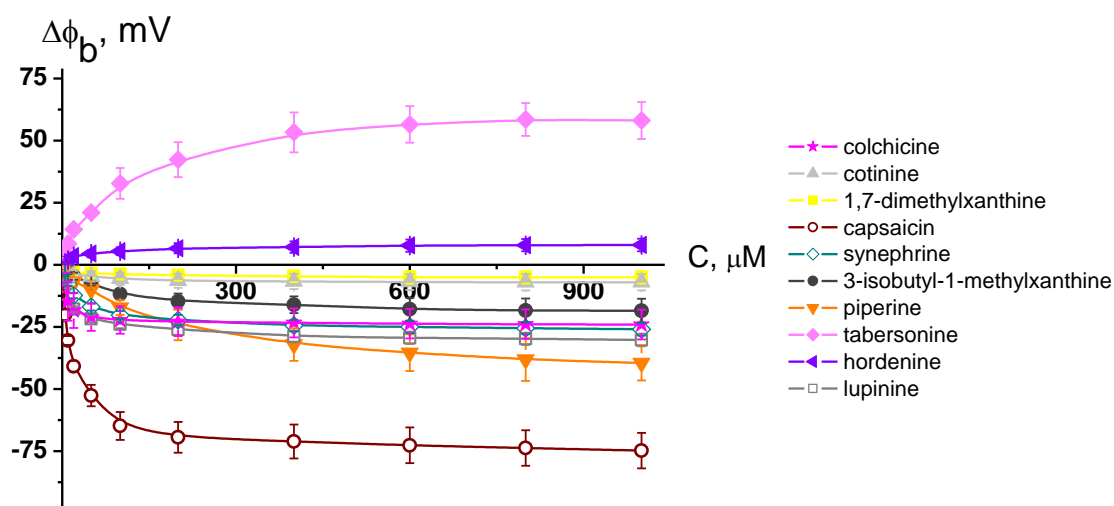

**Figure S5.** The dependence of the changes in the membrane boundary potential ( $\Delta\phi_b$ ) on the concentration of colchicine (\*), cotinine (▲), 1,7-dimethylxanthine (■), capsaicin (○), synephrine (◇), 3-isobutyl-1-methylxanthine (●), lupinine (□), piperine (▼), tabersonine (◆), and hordenine (◄). The membranes were composed of DOPG/CHOL (80/20 mol%) and bathed in 0.1 M KCl at pH 7.4.  $V = 50$  mV.

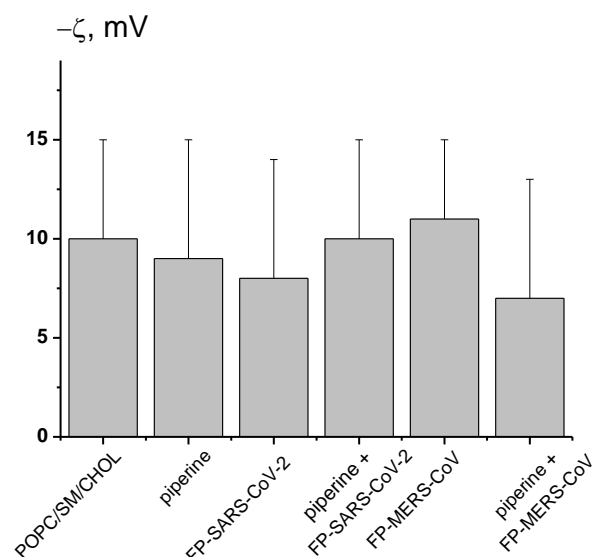

**Figure S6.** The  $\zeta$ -potential of the POPC/SM/CHOL (60/20/20 mol%) liposomes before and after addition of 50  $\mu$ M of FP-SARS-CoV-2 or 200  $\mu$ M of FP-MERS-CoV to unmodified and pretreated by 400  $\mu$ M of piperine vesicles.

**Table S1.** The parameters characterized the alkaloid molecules and their influence on the calcein leakage from liposomes of different composition.

| alkaloid                        | charge* | LogD <sub>o/w</sub> * | RF <sub>A</sub> , % |                     |              |
|---------------------------------|---------|-----------------------|---------------------|---------------------|--------------|
|                                 |         |                       | DOPG/CHOL           | DOPC/DOPG/CHOL      | POPC/SM/CHOL |
| 3,9-dimethylxanthine            | -0.02   | -0.82                 | 4 ± 2               | 3 ± 2               | –            |
| caffeine                        | 0       | -0.55                 | 3 ± 2               | 2 ± 1               | –            |
| 7-(β-hydroxyethyl) theophylline | 0       | -1.24                 | 4 ± 2               | 2 ± 1               | –            |
| colchicine                      | 0       | 1.46                  | 4 ± 2               | 4 ± 3               | –            |
| pentoxifylline                  | 0       | 0.23                  | 2 ± 1               | 2 ± 1               | –            |
| cotinine                        | 0       | 0.21                  | 6 ± 2               | 3 ± 2               | –            |
| 1,7-dimethylxanthine            | 0       | 0.24                  | 4 ± 2               | 2 ± 1               | –            |
| atropine                        | 0.99    | -0.41                 | 2 ± 1               | 2 ± 1               | –            |
| theophylline                    | -0.28   | -0.89                 | 5 ± 2               | 4 ± 2               | –            |
| melatonin                       | 0       | 1.15                  | 3 ± 2               | 3 ± 2               | –            |
| berberine                       | 1       | -1.28                 | 11 ± 4              | 5 ± 3               | –            |
| dihydrocapsaicin                | 0       | 4.11                  | 20 ± 7              | 26 ± 6              | –            |
| capsaicin                       | 0       | 3.75                  | 19 ± 7              | 24 ± 5              | –            |
| synephrine                      | 0.97    | -1.39                 | 5 ± 2               | 4 ± 2               | –            |
| 3-isobutyl-1-methylxanthine     | -0.09   | 0.4                   | 7 ± 4               | 9 ± 5               | 8 ± 4        |
| quinine                         | 0.98    | 0.86                  | 24 ± 8              | 20 ± 6              | –            |
| piperine                        | 0       | 2.78                  | 12 ± 4              | 8 ± 3               | 7 ± 4        |
| tabersonine                     | 0.98    | 0.9                   | 19 ± 4 <sup>@</sup> | 14 ± 3 <sup>@</sup> | 5 ± 3        |
| hordenine                       | 0.98    | 0.06                  | 8 ± 4               | 5 ± 2               | 2 ± 1        |
| lupinine                        | 1       | -1.52                 | 6 ± 3               | 7 ± 4               | 3 ± 2        |

\* the values of the total electrical charge and the logarithm of octanol/water distribution coefficient at pH 7.4, LogD<sub>o/w</sub>, were predicted by ChemAxon.

RF<sub>A</sub> – the maximal leakage of the fluorescent marker from vesicles composed of DOPG/CHOL (80/20 mol%), DOPC/DOPG/CHOL (40/40/20 mol%), and POPC/SM/CHOL (60/20/20 mol%) induced by 400  $\mu$ M of alkaloids (@ – 40  $\mu$ M of tabersonine was used to modify DOPG/CHOL and DOPC/DOPG/CHOL liposomes).
